# Supplementary material
Source: Springer Nature journal article supplement (https://www.springermedizin.de/resource/supplementary/12871_2013_210_MOESM2_ESM.pdf/9429152)
Supplement: MOESM2 [file 9429152]

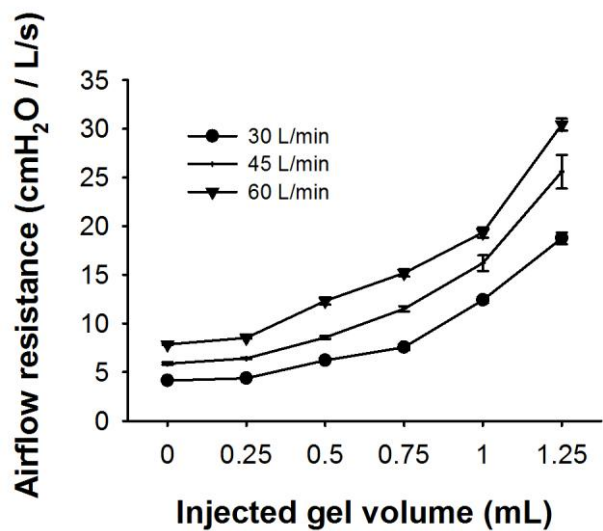

**Figure E1** Increase in resistance to airflow in a 7.5 mm ETT by increase of injected gel amount, resembling the biofilm present at extubation. The increase of resistances is more pronounced at higher flows ( $p < 0.001$ )
